# Supplementary material for: Non-adiabatic dynamics simulation exploration of the wavelength-dependent photoinduced relaxation mechanism of trans-N-1-methyl-2-(tolylazo) imidazole in the gas phase
Source: Royal Society of Chemistry journal article supplement (doi:10.1039/c6ra11416d), 2016-01-01
Supplement: c6ra11416d1.pdf [file c6ra11416d1.pdf]

Supplementary Information for

**Non-Adiabatic Dynamics Simulation Exploration on  
Wavelength-Dependent Photoinduced Relaxation Mechanism of  
Trans-N-1-Methyl-2-(Tolylazo) Imidazole in Gas Phase**

Li Zhao,<sup>1,2</sup> Panwang Zhou,<sup>1\*</sup> and Guang-Jiu Zhao<sup>1,\*</sup>

*<sup>1</sup>State Key Laboratory of Molecular Reaction Dynamics, Dalian Institute of Chemical  
Physics, Chinese Academy of Sciences, Dalian 116023, China*

*<sup>2</sup>University of the Chinese Academy of Sciences, Beijing 100049, China*

# CONTENTS

- a. The active spaces included in CASSCF(12,10) and CASSCF (6,5) calculation levels, Figure 1S shows active orbitals for the most stable ground-state conformation of trans-MTAI .....p. S4
- b. The energy profiles along constructed linearly interpolated internal coordinate (LIIC) pathway between FC and MECI1 (left) and MECI5 (right) at SA3-CASSCF(12,10)/6-31G\* (a and b) CASPT2 (c and d) calculation levels, shown in Figure 2S. ....p. S5
- c. The energy profiles along constructed LIIC pathway between FC and MECI1 (bottom) and MECI5 (top) at SA2-CASSCF(12,10)/6-31G\*(left) and SA3-CASSCF(12,10)/6-31G\*(right) levles, show in Figure 3S.....p. S6
- d. The calculation details of the different CASSCF parameters (the active spaces, the number of states included in the averaging procedure and the basis sets) used to determine a reasonable calculation level for the dynamics simulations.....p.S7
- e. The most relevant geometrical parameters of the stable structures of the  $S_0$ ,  $S_1$  and  $S_2$  states and the six minimum energy conical intersections optimized at SA3-CASSCF(12,10) /6-31G\* and 6-311G\*\* levels, shown in Table 1S .....p.S8
- f. The most relevant geometrical parameters of the stable structures of the  $S_0$ ,  $S_1$  and  $S_2$  states optimized at SA2-CASSCF(6,5)/6-31G, SA3-CASSCF(6,5)/6-31G, SA2-CASSCF(10,8)/6-31G\*, SA3-CASSCF(10,8)/ 6-31G\*, SA2-CASSCF(12,10)/6-31G\*, and SA3-CASSCF(12,10)/6-31G\* levels, shown in Table 2S.....p.S9
- g. The key geometrical parameters of six minimum energy conical intersections optimized at SA2-CASSCF(10,8)/6-31G\*, SA3-CASSCF(10,8)/6-31G\*, SA2-CASSCF(12,10)/6-31G\* and SA3-CASSCF(12,10)/6-31G\* levels, Table 3S...p. S10
- h. The relative energies at different geometries calculated at different CASSCF levels as mentioned above, shown in Table 4S.....pS11-S12
- i. Diagram (left) for bond angles NNC9 (ordinate) and C6NN (abscissa), and (right) for

dihedral angle CNNC (ordinate) and bond angle C6NN (abscissa) at hopping points from the  $S_1$  to  $S_0$  state. The blue hexagons show the four twist MECIs and red quadrangle shows MECI5 optimized at SA3-CASSCF(12,10)/6-31G\* level. The dynamics simulations were started from the  $S_1$  state performed at SA3-CASSCF(6,5)/6-31G level, shown in Figure 4S.....p.S13

j. Time-dependent potential energies of the  $S_0$ ,  $S_1$  and  $S_2$  states for a typical trajectory, shown in Figure 5S.....p.S14

k. Figure 6S. Time-dependent parameter variables of a typical trajectory started from the  $S_1$  state performed at SA3-CASSCF(6,5)/6-31G level. top: the lengths of twist bonds NC9, NN and C6N; middle: time evolution of the two key bond angles NNC9 and C6NN; bottom: the dihedral angle C6NNC9 related with the twist motion around NN bond over the simulation time of 900 fs. The vertical dashed lines indicate the hopping time.....p.S15

l. The coordinates of endpoints used in LIIC were presented in Table 5S-6S in Z-matrices form.....p.S16- S17

m. Cartesian coordinates of optimized structures calculated at SA3-CASSCF(12,10)/6-31G\* level: Table 7S-11S.....p. S18-S22

n. The Cartesian coordinates of optimized structures calculated at SA3-CASSCF(12,10)/ 6-311G\*\* level: Table 12S-16S.....p. S23-S27

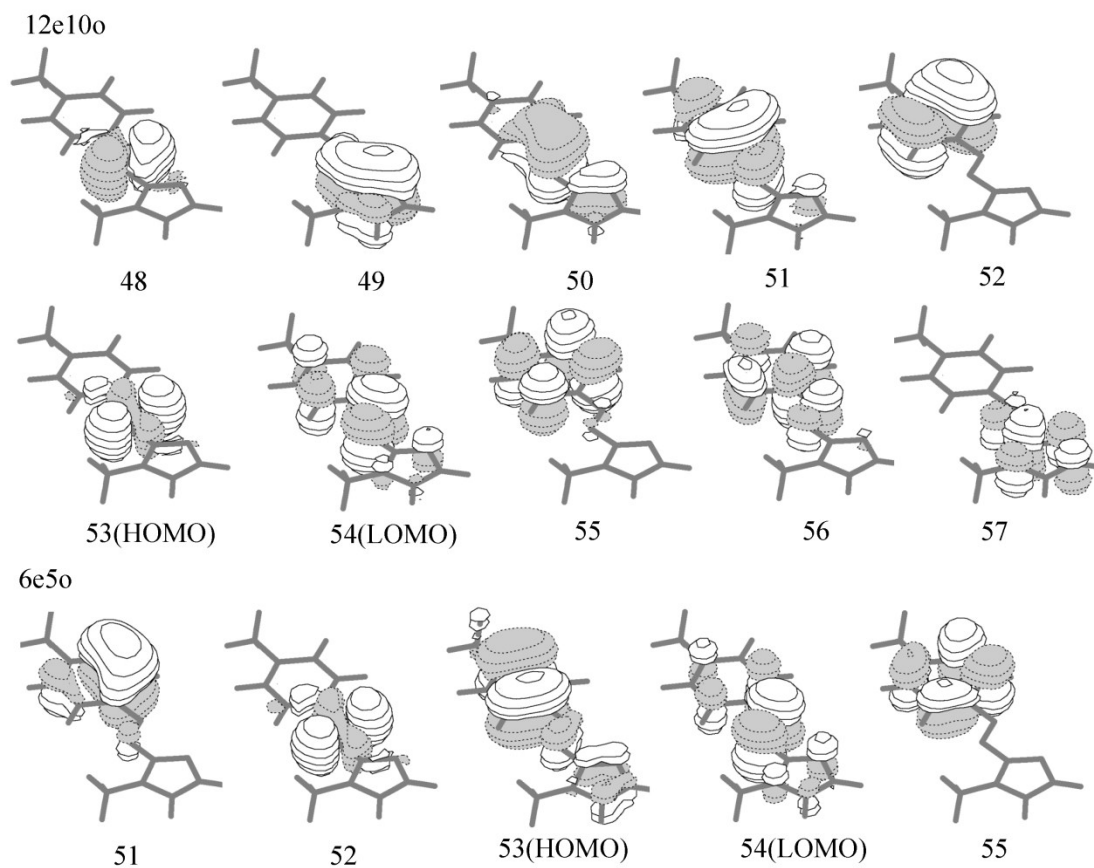

**Figure 1S.** The active spaces included in CASSCF(12,10) and CASSCF (6,5) calculation levels, Figure 1S shows the active orbitals for the most stable ground-state conformation of trans-MTAI.

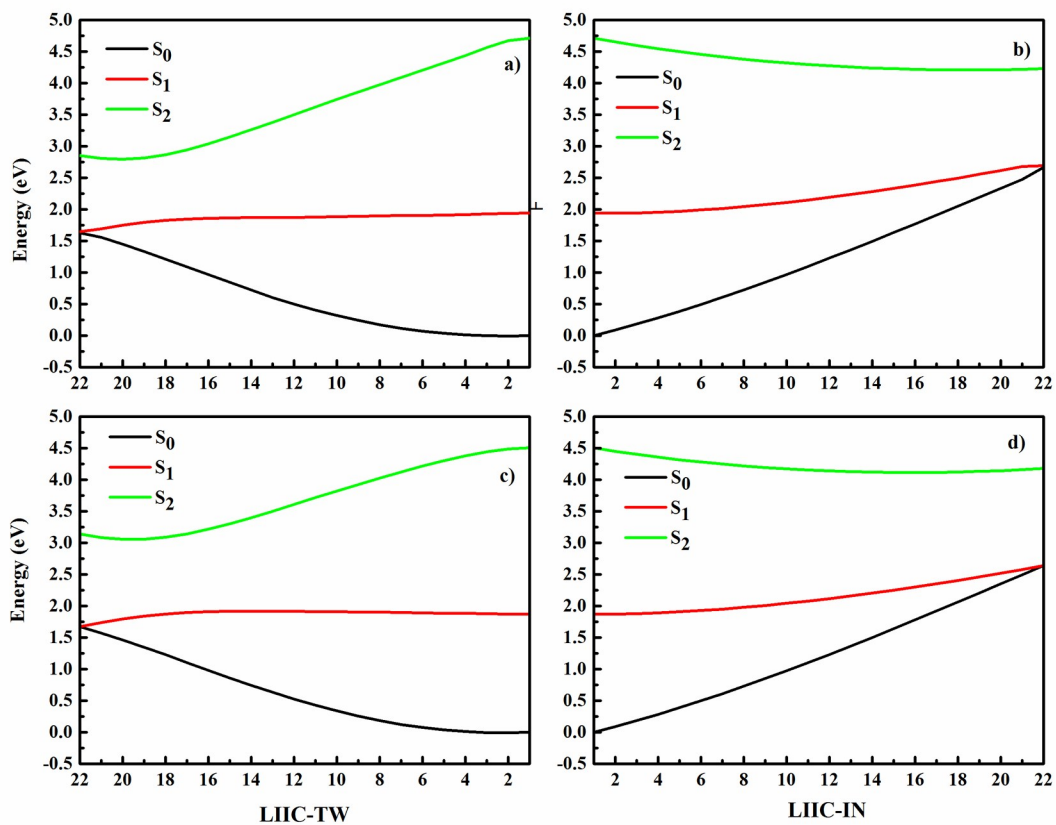

**Figure 2S.** The energy profiles along constructed linearly interpolated internal coordinate (LIIC) pathway between FC and MECI1 (left) and MECI5 (right) at SA3-CASSCF(12,10) /6-31G\* (a and b) CASPT2 (c and d) calculation levels.

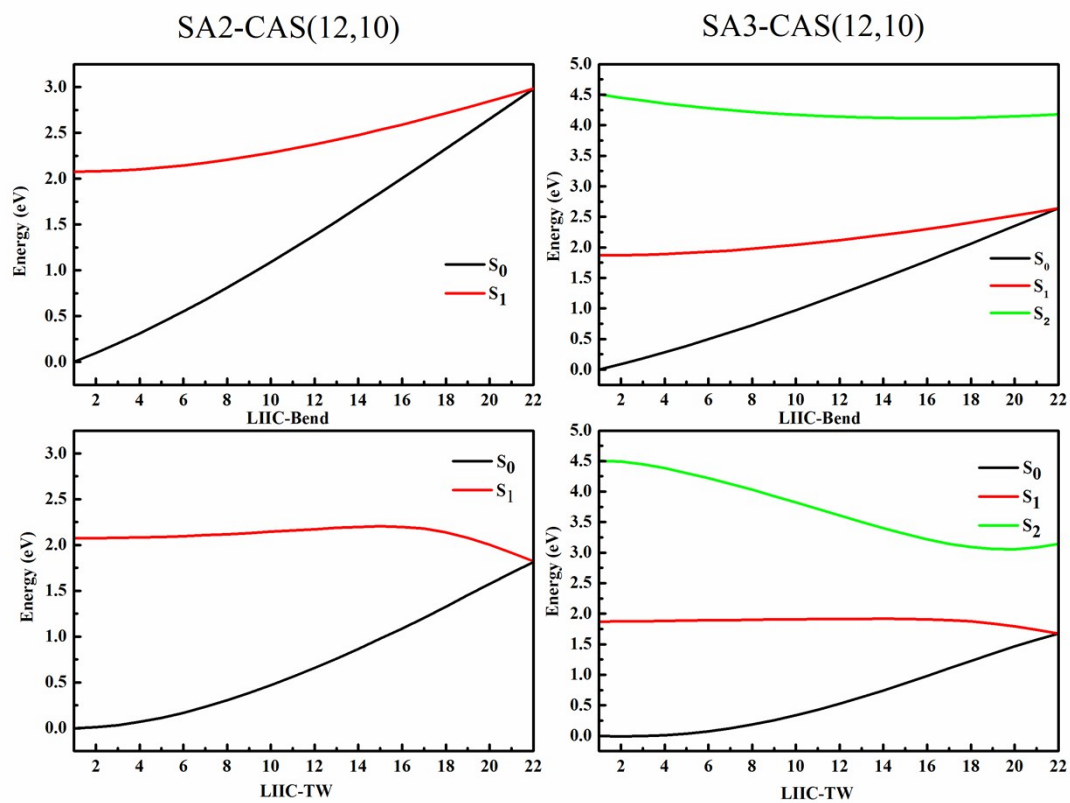

**Figure 3S.** The energy profiles along constructed linearly interpolated internal coordinate (LIIC) pathway between FC and MECI1 (bottom) and MECI15 (top) at SA2-CASSCF(12,10)/6-31G\* (left) and SA3-CASSCF(12,10)/6-31G\* (right) calculation levels.

## Calculation Details of Different CASSCF parameters (continued)

Firstly, in order to check the accuracy of calculation results we obtained with 6-31G\*, larger basis set 6-311G\*\* was employed to examine the effect of the size of basis set on the optimized configurations. The most relevant geometrical parameters calculated at SA3-CASSCF(12,10)/6-311G\*\* and 6-31G\* levels are summarized in Table 1S, and the relevant Cartesian coordinates are provided in Table 12S-16S. The calculation results indicated that the size of basis set do not have much effect on the optimized geometries.

In order to determine a reasonable calculation level which can provide a balanced description of results accuracy and calculation cost, different CASSCF parameters SA3-CASSCF(10,8)/6-31G\*, SA3-CASSCF(6,5)/6-31G, SA2-CASSCF (12,10)/6-31G\*, SA2-CASSCF(10,8)/6-31G\* and SA2-CASSCF(6,5)/6-31G were employed to compare the results obtained by SA3-CASSCF(12,10)/6-31G\* method. The most relevant parameters are summarized in Table 2S, and the relative energies at different geometries are presented in Table 3S. The results computed at all levels we performed present essentially the same qualitative features.

Next, We compared the energy profiles of the  $S_1$  state at SA3-CASSCF(12,10)/6-31G\* and SA2-CASSCF(12,10)/6-31G\* levels to test the influence of numbers of states included in the averaging procedure, which has been presented in Figure 3S. Obviously, the two levels give essentially the same qualitative features, which should lead to similar dynamics behaviors. For further confirmation, 20 trajectories performed at SA3-CASSCF(6,5)/6-31G level have been performed to compare the results obtained at SA2-CASSCF(6,5)/6-31G level. The results are presented in Figure 4S -6S. All hopping structures are around the four twisting related MECIs, but far away from MECI5. The results are consistent with those obtained at SA2-CASSCF(6,5)/6-31G level.

In sum, the SA3-CASSCF(6,5)/6-31G method used for the  $S_2$  state dynamics simulation and SA2-CASSCF(6,5)/6-31G used for the  $S_1$  state dynamics simulations are reasonable based on the calculations we performed before.

**Table 1S** Key geometrical parameters of optimal structures in the  $S_0$ ,  $S_1$  and  $S_2$  states and the six minimum energy conical intersections calculated at SA3-CASSCF(12,10)/6-31G\* and SA3-CASSCF(12,10)/6-311G\*\* levels, with the bond lengths in angstroms, angles in degree.

| Geo.                | Method | C6N7  | NN    | N8C9  | C6N7N8 | N7N8C9 | C6N7N8C9 |
|---------------------|--------|-------|-------|-------|--------|--------|----------|
| S <sub>0</sub> -min | a      | 1.418 | 1.244 | 1.405 | 115.2  | 114.4  | -180.0   |
|                     | b      | 1.447 | 1.238 | 1.409 | 114.7  | 114.3  | -180.0   |
| S <sub>1</sub> -min | a      | 1.359 | 1.257 | 1.359 | 130.5  | 124.6  | 180.0    |
|                     | b      | 1.359 | 130.5 | 1.376 | 130.5  | 124.6  | 180.0    |
| S <sub>2</sub> -min | a      | 1.308 | 1.361 | 1.341 | 113.4  | 112.8  | 179.9    |
|                     | b      | 1.307 | 1.364 | 1.389 | 112.8  | 112.1  | 179.9    |
| MECI1               | a      | 1.391 | 1.272 | 1.358 | 118.9  | 135.7  | 94.1     |
|                     | b      | 1.403 | 1.258 | 1.352 | 118.6  | 139.7  | 95.7     |
| MECI2               | a      | 1.398 | 1.265 | 1.356 | 118.9  | 135.7  | -93.2    |
|                     | b      | 1.406 | 1.256 | 1.353 | 118.5  | 140.4  | -95.3    |
| MECI3               | a      | 1.359 | 1.254 | 1.405 | 143.6  | 116.5  | 95.4     |
|                     | b      | 1.359 | 1.251 | 1.406 | 143.5  | 116.6  | 95.3     |
| MECI4               | a      | 1.357 | 1.253 | 1.406 | 144.1  | 116.5  | -95.7    |
|                     | b      | 1.358 | 1.252 | 1.395 | 143.5  | 116.9  | -95.1    |
| MECI5               | a      | 1.286 | 1.210 | 1.350 | 156.5  | 144.1  | 179.9    |
|                     | b      | 1.281 | 1.202 | 1.356 | 157.8  | 147.6  | 179.9    |
| MECI6               | a      | 1.317 | 1.348 | 1.334 | 111.7  | 113.9  | -179.9   |
|                     | b      | 1.289 | 1.443 | 1.383 | 105.1  | 106.4  | -179.9   |

a.SA3-CASSCF(12,10)/6-31G\*; b.SA3-CASSCF(12,10)/6-311G\*\*



**Table 2S** Key geometrical parameters of optimal structures in  $S_0$ ,  $S_1$  and  $S_2$  states optimized at different CASSCF levels, with the bond lengths in angstroms, angles in degree.

| Geometry   | Method                           | C6-N7 | N7-N8 | N8-C9 | C6-N7-N8 | N7-N8-C9 | C6-N7-N8-C9 |
|------------|----------------------------------|-------|-------|-------|----------|----------|-------------|
| $S_0$ -min | SA2-CASSCF(6,5) <sup>[a]</sup>   | 1.428 | 1.246 | 1.408 | 115.2    | 114.1    | -180.0      |
|            | SA2-CASSCF(10,8) <sup>[b]</sup>  | 1.419 | 1.246 | 1.413 | 115.0    | 114.2    | -180.0      |
|            | SA2-CASSCF(12,10) <sup>[b]</sup> | 1.419 | 1.246 | 1.413 | 115.1    | 114.0    | -180.0      |
|            | SA3-CASSCF(6,5) <sup>[a]</sup>   | 1.383 | 1.239 | 1.394 | 118.8    | 117.6    | -180.0      |
|            | SA3-CASSCF(10,8) <sup>[b]</sup>  | 1.419 | 1.243 | 1.409 | 115.2    | 114.1    | -180.0      |
|            | SA3-CASSCF(12,10) <sup>[b]</sup> | 1.418 | 1.244 | 1.405 | 115.2    | 114.4    | -180.0      |
| $S_1$ -min | SA2-CASSCF(6,5) <sup>[a]</sup>   | 1.377 | 1.292 | 1.379 | 136.7    | 117.8    | 180.0       |
|            | SA2-CASSCF(10,8) <sup>[b]</sup>  | 1.359 | 1.257 | 1.378 | 130.7    | 124.2    | 180.0       |
|            | SA2-CASSCF(12,10) <sup>[b]</sup> | 1.359 | 1.257 | 1.378 | 130.5    | 124.5    | 180.0       |
|            | SA3-CASSCF(6,5) <sup>[a]</sup>   | 1.367 | 1.245 | 1.367 | 134.1    | 127.6    | 180.0       |
|            | SA3-CASSCF(10,8) <sup>[b]</sup>  | 1.359 | 1.257 | 1.377 | 130.7    | 124.3    | 180.0       |
|            | SA3-CASSCF(12,10) <sup>[b]</sup> | 1.359 | 1.257 | 1.359 | 130.5    | 124.6    | 180.0       |
| $S_2$ -min | SA3-CASSCF(6,5) <sup>[a]</sup>   | 1.291 | 1.365 | 1.376 | 114.5    | 114.5    | -179.9      |
|            | SA3-CASSCF(10,8) <sup>[b]</sup>  | 1.305 | 1.343 | 1.382 | 113.4    | 112.9    | 179.9       |
|            | SA3-CASSCF(12,10) <sup>[b]</sup> | 1.308 | 1.361 | 1.341 | 113.4    | 112.8    | 179.9       |

<sup>[a]</sup> 6-31G basis set; <sup>[b]</sup> 6-31G\* basis set;

**Table 3S** Key geometrical parameters of six minimum energy conical intersections (MECIs)

optimized at different CASSCF levels, with the bond lengths in angstroms, angles in degree.

| Geometry | Method <sup>[a]</sup> | C6-N7 | N7-N8 | N8-C9 | C6-N7-N8 | N7-N8-C9 | C6-N7-N8-C9 |
|----------|-----------------------|-------|-------|-------|----------|----------|-------------|
| MECI1    | SA2-CASSCF(10,8)      | 1.393 | 1.271 | 1.358 | 118.8    | 133.6    | 94.2        |
|          | SA2-CASSCF(12,10)     | 1.390 | 1.272 | 1.358 | 118.9    | 132.5    | 93.7        |
|          | SA3-CASSCF(10,8)      | 1.400 | 1.264 | 1.357 | 118.7    | 136.9    | 94.8        |
|          | SA3-CASSCF(12,10)     | 1.391 | 1.272 | 1.358 | 118.9    | 132.5    | -92.9       |
| MECI2    | SA2-CASSCF(10,8)      | 1.395 | 1.270 | 1.358 | 118.7    | 133.8    | -93.3       |
|          | SA2-CASSCF(12,10)     | 1.391 | 1.272 | 1.358 | 118.9    | 132.5    | -92.9       |
|          | SA3-CASSCF(10,8)      | 1.400 | 1.264 | 1.357 | 118.7    | 136.8    | -94.7       |
|          | SA3-CASSCF(12,10)     | 1.398 | 1.265 | 1.356 | 118.9    | 135.7    | -93.2       |
| MECI3    | SA2-CASSCF(10,8)      | 1.357 | 1.263 | 1.399 | 138.8    | 116.4    | 94.3        |
|          | SA2-CASSCF(12,10)     | 1.356 | 1.261 | 1.403 | 139.5    | 116.4    | 94.5        |
|          | SA3-CASSCF(10,8)      | 1.359 | 1.255 | 1.402 | 142.9    | 116.6    | 95.2        |
|          | SA3-CASSCF(12,10)     | 1.359 | 1.254 | 1.405 | 143.6    | 116.5    | 95.4        |
| MECI4    | SA2-CASSCF(10,8)      | 1.357 | 1.262 | 1.389 | 139.1    | 116.9    | -93.9       |
|          | SA2-CASSCF(12,10)     | 1.355 | 1.260 | 1.403 | 140.1    | 116.3    | -94.5       |
|          | SA3-CASSCF(10,8)      | 1.357 | 1.255 | 1.402 | 143.5    | 116.6    | -95.6       |
|          | SA3-CASSCF(12,10)     | 1.357 | 1.253 | 1.406 | 144.1    | 116.5    | -95.7       |
| MECI5    | SA2-CASSCF(10,8)      | 1.276 | 1.204 | 1.355 | 160.3    | 146.7    | -179.8      |
|          | SA2-CASSCF(12,10)     | 1.277 | 1.206 | 1.353 | 159.3    | 146.2    | -179.4      |
|          | SA3-CASSCF(10,8)      | 1.285 | 1.208 | 1.352 | 157.4    | 144.3    | 179.7       |
|          | SA3-CASSCF(12,10)     | 1.286 | 1.210 | 1.350 | 156.5    | 144.1    | 179.9       |
| MECI6    | SA3-CASSCF(10,8)      | 1.296 | 1.357 | 1.379 | 111.4    | 109.2    | -177.6      |
|          | SA3-CASSCF(12,10)     | 1.317 | 1.348 | 1.334 | 111.7    | 113.9    | -179.9      |

<sup>[a]</sup> 6-31G\* basis set;

**Table 4S** Relative and vertical energies (in eV) of S<sub>0</sub>-min, S<sub>1</sub>-min, S<sub>2</sub>-min and six minimal energy conical intersections calculated at different CASSCF levels.

| Geo.                     | Method                           | (S1-S0)VE <sup>[b]</sup> | E <sup>[c]</sup> | E <sup>[d]</sup> | (S2-S0)VE <sup>[e]</sup> | E <sup>[f]</sup> |
|--------------------------|----------------------------------|--------------------------|------------------|------------------|--------------------------|------------------|
| <b>S<sub>0</sub>-min</b> | SA2-CASSCF(6,5) <sup>[a]</sup>   | 3.74                     | 3.74             | 0.0              | ----                     | ----             |
|                          | SA2-CASSCF(10,8) <sup>[b]</sup>  | 3.22                     | 3.22             | 0.0              | ----                     | ----             |
|                          | SA2-CASSCF(12,10) <sup>[b]</sup> | 3.18                     | 3.18             | 0.0              | ----                     | ----             |
|                          | SA3-CASSCF(6,5) <sup>[a]</sup>   | 3.67                     | 3.67             | 0.0              | 5.23                     | 5.23             |
|                          | SA3-CASSCF(10,8) <sup>[b]</sup>  | 3.30                     | 3.30             | 0.0              | 5.64                     | 5.64             |
|                          | SA3-CASSCF(12,10) <sup>[b]</sup> | 3.24                     | 3.24             | 0.0              | 5.59                     | 5.59             |
| <b>S<sub>1</sub>-min</b> | SA2-CASSCF(6,5) <sup>[a]</sup>   | 2.54                     | 3.14             | -0.59            | ----                     | ----             |
|                          | SA2-CASSCF(10,8) <sup>[b]</sup>  | 2.12                     | 2.74             | -0.48            | ----                     | ----             |
|                          | SA2-CASSCF(12,10) <sup>[b]</sup> | 2.07                     | 2.69             | -0.49            | ----                     | ----             |
|                          | SA3-CASSCF(6,5) <sup>[a]</sup>   | 1.71                     | 2.64             | -1.03            | 3.20                     | 4.12             |
|                          | SA3-CASSCF(10,8) <sup>[b]</sup>  | 1.91                     | 2.68             | -0.62            | 4.59                     | 5.35             |
|                          | SA3-CASSCF(12,10) <sup>[b]</sup> | 1.87                     | 2.72             | ----             | 4.51                     | 5.35             |
| <b>S<sub>2</sub>-min</b> | SA3-CASSCF(6,5) <sup>[a]</sup>   | 3.09                     | 3.96             | 0.29             | 3.53                     | 4.41             |
|                          | SA3-CASSCF(10,8) <sup>[b]</sup>  | 2.97                     | 3.86             | 0.56             | 4.26                     | 4.93             |
|                          | SA3-CASSCF(12,10) <sup>[b]</sup> | 1.87                     | 2.72             | ----             | 4.51                     | 5.35             |
| <b>MECI1</b>             | SA2-CASSCF(6,5) <sup>[a]</sup>   | 0.00                     | 2.44             | -1.29            | ----                     | ----             |
|                          | SA2-CASSCF(10,8) <sup>[b]</sup>  | 0.00                     | 2.40             | -0.82            | ----                     | ----             |
|                          | SA2-CASSCF(12,10) <sup>[b]</sup> | 0.00                     | 2.43             | -0.26            | ----                     | ----             |
|                          | SA3-CASSCF(6,5) <sup>[a]</sup>   | 0.00                     | 1.77             | -1.9             | 1.55                     | 3.32             |
|                          | SA3-CASSCF(10,8) <sup>[b]</sup>  | 0.00                     | 2.47             | -0.83            | 1.46                     | 3.93             |
|                          | SA3-CASSCF(12,10) <sup>[b]</sup> | 0.00                     | 2.50             | -0.22            | 1.47                     | 3.97             |
| <b>MECI2</b>             | SA2-CASSCF(6,5) <sup>[a]</sup>   | 0.00                     | 2.35             | -0.33            | ----                     | ----             |
|                          | SA2-CASSCF(10,8) <sup>[b]</sup>  | 0.00                     | 2.51             | -0.21            | ----                     | ----             |
|                          | SA2-CASSCF(12,10) <sup>[b]</sup> | 0.00                     | 2.35             | -0.83            | ----                     | ----             |
|                          | SA3-CASSCF(6,5) <sup>[a]</sup>   | 0.00                     | 1.77             | -1.9             | 1.55                     | 3.32             |
|                          | SA3-CASSCF(10,8) <sup>[b]</sup>  | 0.00                     | 2.47             | -0.83            | 1.46                     | 3.93             |
| <b>MECI3</b>             | SA2-CASSCF(6,5) <sup>[a]</sup>   | 0.00                     | 2.35             | -0.33            | ----                     | ----             |
|                          | SA2-CASSCF(10,8) <sup>[b]</sup>  | 0.00                     | 2.51             | -0.21            | ----                     | ----             |
|                          | SA2-CASSCF(12,10) <sup>[b]</sup> | 0.00                     | 2.35             | -0.83            | ----                     | ----             |
|                          | SA3-CASSCF(6,5) <sup>[a]</sup>   | 0.00                     | 1.77             | -1.9             | 1.55                     | 3.32             |
|                          | SA3-CASSCF(10,8) <sup>[b]</sup>  | 0.00                     | 2.47             | -0.83            | 1.46                     | 3.93             |
| <b>MECI4</b>             | SA2-CASSCF(6,5) <sup>[a]</sup>   | 0.01                     | 2.43             | -1.31            | ----                     | ----             |
|                          | SA2-CASSCF(10,8) <sup>[b]</sup>  | 0.00                     | 2.44             | -0.78            | ----                     | ----             |
|                          | SA2-CASSCF(12,10) <sup>[b]</sup> | 0.00                     | 2.43             | -0.26            | ----                     | ----             |
|                          | SA3-CASSCF(6,5) <sup>[a]</sup>   | 0.25                     | 2.34             | -1.33            | 1.56                     | 3.65             |
|                          | SA3-CASSCF(10,8) <sup>[b]</sup>  | 0.00                     | 2.52             | -0.78            | 1.53                     | 4.05             |
| <b>MECI5</b>             | SA2-CASSCF(6,5) <sup>[a]</sup>   | 0.002                    | 2.60             | -0.12            | 1.50                     | 4.09             |
|                          | SA2-CASSCF(10,8) <sup>[b]</sup>  | 0.00                     | 2.31             | -1.43            | ----                     | ----             |
|                          | SA2-CASSCF(12,10) <sup>[b]</sup> | 0.00                     | 2.54             | -0.68            | ----                     | ----             |
|                          | SA3-CASSCF(6,5) <sup>[a]</sup>   | 0.00                     | 2.43             | -0.26            | ----                     | ----             |
| <b>MECI6</b>             | SA2-CASSCF(6,5) <sup>[a]</sup>   | 0.13                     | 2.15             | -1.52            | 1.40                     | 3.42             |

**Continued**

---

|              |                                  |        |      |       |      |      |
|--------------|----------------------------------|--------|------|-------|------|------|
|              | SA3-CASSCF(10,8) <sup>[b]</sup>  | 0.00   | 2.52 | -0.78 | 1.57 | 4.08 |
|              | SA3-CASSCF(12,10) <sup>[b]</sup> | 0.00   | 2.59 | -0.13 | 1.53 | 4.12 |
| <b>MECI5</b> | SA2-CASSCF(6,5) <sup>[a]</sup>   | 0.00   | 4.38 | 0.64  | ---- | ---- |
|              | SA2-CASSCF(10,8) <sup>[b]</sup>  | 0.00   | 3.68 | 0.46  | ---- | ---- |
|              | SA2-CASSCF(12,10) <sup>[b]</sup> | 0.002  | 3.59 | 0.90  | ---- | ---- |
|              | SA3-CASSCF(6,5) <sup>[a]</sup>   | 0.12   | 3.84 | 0.18  | 1.36 | 5.08 |
|              | SA3-CASSCF(10,8) <sup>[b]</sup>  | 0.00   | 3.48 | 0.18  | 1.56 | 5.03 |
|              | SA3-CASSCF(12,10) <sup>[b]</sup> | 0.0002 | 3.49 | 0.77  | 1.53 | 5.02 |
| <b>MECI6</b> | SA3-CASSCF(6,5) <sup>[a]</sup>   | 3.27   | 4.54 | 0.87  | 3.27 | 4.54 |
|              | SA3-CASSCF(10,8) <sup>[b]</sup>  | 3.69   | 4.78 | 1.58  | 3.73 | 4.83 |
|              | SA3-CASSCF(12,10) <sup>[b]</sup> | 4.00   | 4.72 | 2.00  | 4.00 | 4.72 |

<sup>[a]</sup> 6-31G\* basis set; <sup>[b]</sup> vertical energies excited to S<sub>1</sub> state; <sup>[c]</sup> S<sub>1</sub> state energies relative to ground state energy of S<sub>0</sub>-min;

<sup>[d]</sup> S<sub>1</sub> state energies relative to S<sub>1</sub> state energy of S<sub>1</sub>-min geometry; <sup>[e]</sup> vertical energies excited to S<sub>2</sub> state

<sup>[f]</sup> S<sub>2</sub> state energies relative to ground state energy of S<sub>0</sub>-min;

---

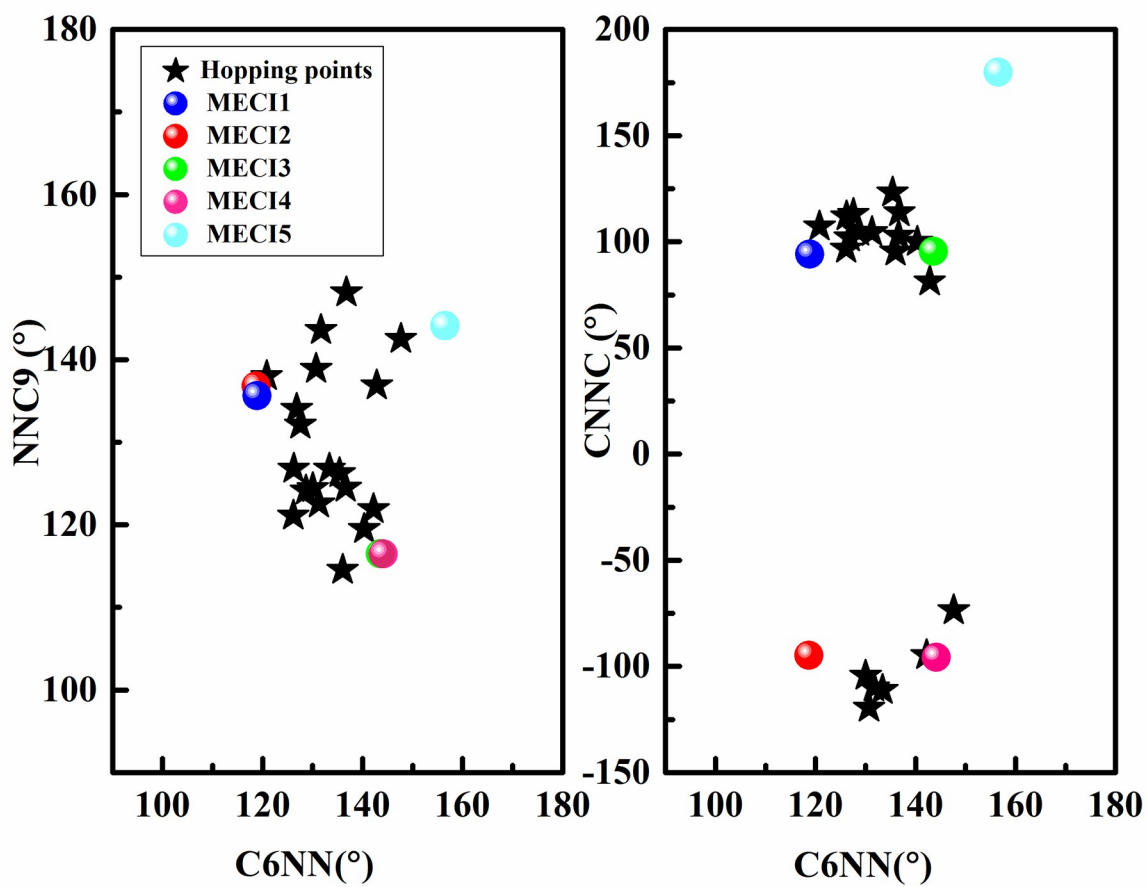

**Figure 4S.** Diagram (left) for bond angles NNC9 (ordinate) and C6NN (abscissa), and (right) for dihedral angle CNNC (ordinate) and bond angle C6NN (abscissa) at hopping points from the  $S_1$  to  $S_0$  state. The five MECIs were optimized at the SA3-CASSCF(12,10)/6-31G\* level.

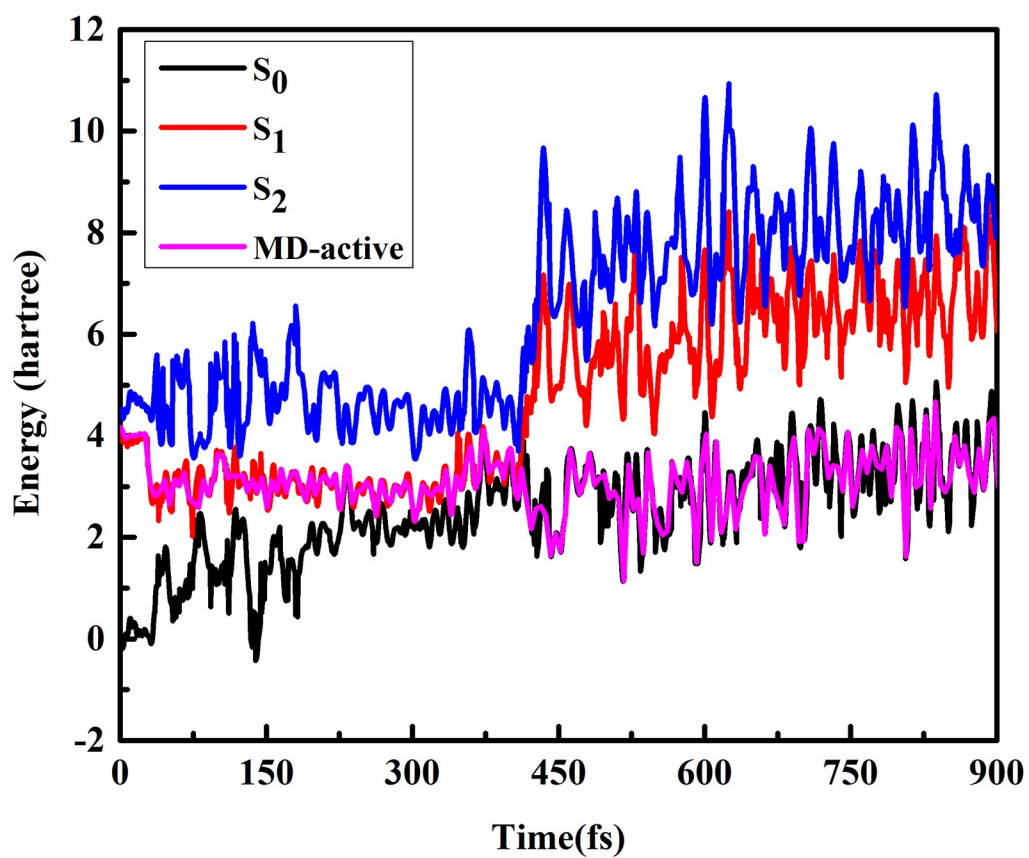

**Figure 5S.** Time-dependent potential energies of  $S_0$ ,  $S_1$  and  $S_2$  states for a typical trajectory.

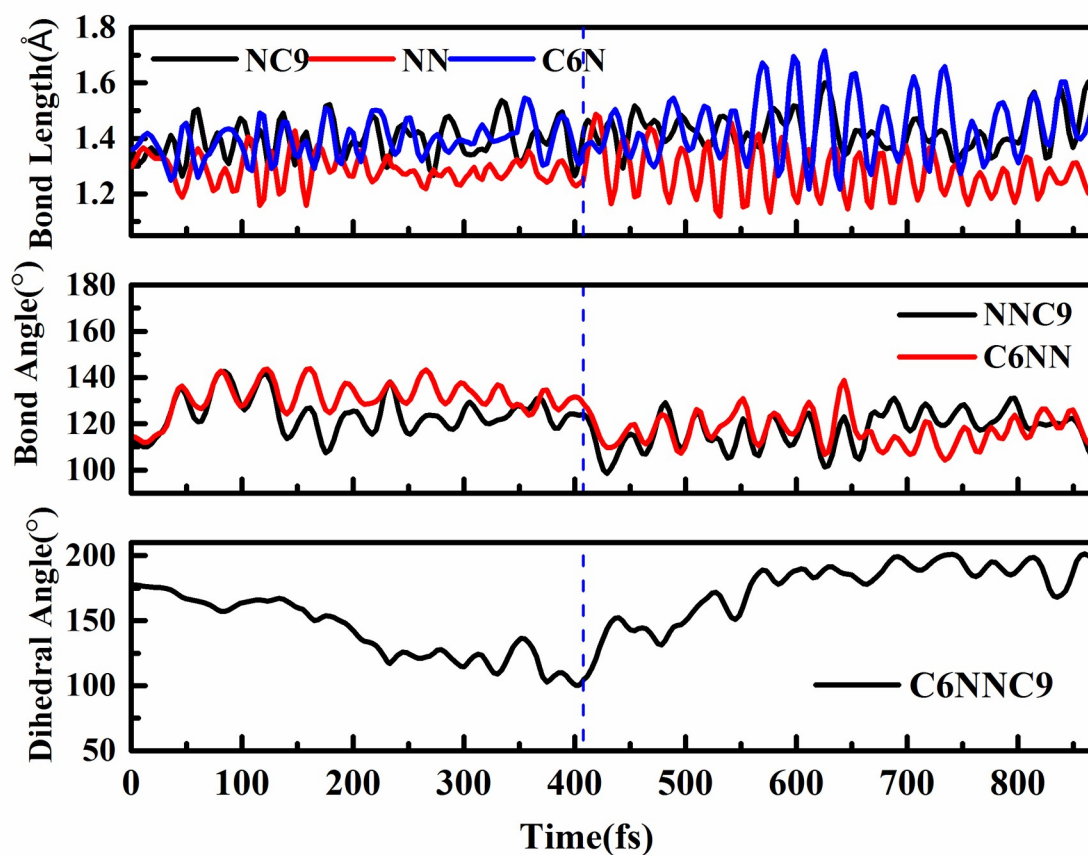

**Figure 6S.** Time-dependent parameter variables of a typical trajectory started from  $S_1$  state performed with SA3-CASSCF(6,5)/6-31G level. top: the lengths of twist bonds NC9, NN and C6N; middle: time evolution of the two key bond angles NNC9 and C6NN; bottom: the dihedral angle C6NNC9 related with the twist motion around NN bond over the simulation time of 900 fs.

The vertical dashed lines indicate the hopping time.

**Table S5.** The ground state coordinates of S<sub>1</sub>-min (left), MECI1(middle) and MECI5(right) used in LIIC in Z-matrices form at SA3-CASSCF(12,10)/6-31G\* level.

|                                       |                                       |                                       |
|---------------------------------------|---------------------------------------|---------------------------------------|
| C                                     | C                                     | C                                     |
| C 1 1.38031                           | C 1 1.39171                           | C 1 1.33611                           |
| C 2 1.38796 1 122.1291                | C 2 1.39751 1 121.2721                | C 2 1.44619 1 122.7190                |
| C 3 1.40636 2 117.8728 1 0.0000       | C 3 1.40180 2 118.2334 1 -0.0000      | C 3 1.40128 2 117.3457 1 0.0000       |
| C 4 1.38309 3 121.4947 2 -0.0000      | C 4 1.37002 3 121.2430 2 -0.0000      | C 4 1.38630 3 122.6051 2 -0.0000      |
| C 1 1.40757 5 30.4718 2 180.0000      | C 1 1.39910 5 30.3126 2 180.0000      | C 1 1.46000 5 30.5157 2 -180.0000     |
| N 6 1.35913 1 122.4820 5 180.0000     | N 6 1.39804 1 124.7162 5 -179.0073    | N 6 1.28602 1 120.2921 5 -180.0000    |
| N 7 1.25656 6 130.4924 1 0.0000       | N 7 1.26553 6 118.8546 1 -5.3428      | N 7 1.21013 6 156.4555 1 0.0000       |
| C 8 1.37652 7 124.5587 6 180.0000     | C 8 1.35645 7 135.6567 6 94.0832      | C 8 1.35004 7 144.0564 6 180.0000     |
| N 9 1.28615 8 126.7276 7 -0.0000      | N 9 1.28906 8 125.8154 7 -12.9310     | N 9 1.28703 8 125.4951 7 -0.0000      |
| C 10 1.38071 9 104.4730 8 -180.0000   | C 10 1.38364 9 104.3051 8 -180.0000   | C 10 1.38724 9 103.8408 8 -180.0000   |
| C 11 1.35688 10 110.5165 9 0.0000     | C 11 1.35570 10 110.6805 9 0.0000     | C 11 1.35344 10 110.9612 9 0.0000     |
| H 1 1.07332 2 120.6459 6 -180.0000    | H 1 1.07250 2 120.3251 6 -180.0000    | H 1 1.07475 2 121.5366 6 -180.0000    |
| H 2 1.07629 1 118.5221 3 180.0000     | H 2 1.07553 1 119.1610 3 180.0000     | H 2 1.07678 1 118.8399 3 -180.0000    |
| H 4 1.07615 5 119.0472 3 -180.0000    | H 4 1.07619 5 119.4329 3 -180.0000    | H 4 1.07607 5 118.2237 3 -180.0000    |
| H 5 1.07386 4 121.1098 6 180.0000     | H 5 1.07407 4 121.1904 6 180.0000     | H 5 1.07293 4 121.4473 6 -180.0000    |
| H 11 1.06941 10 121.0578 12 -180.0000 | H 11 1.06947 10 120.9611 12 -180.0000 | H 11 1.06926 10 120.7327 12 -180.0000 |
| H 12 1.06833 11 132.5757 17 -0.0000   | H 12 1.06813 11 132.6729 17 0.0000    | H 12 1.06773 11 132.9684 17 0.0000    |
| N 9 1.35262 8 119.1039 7 180.0000     | N 9 1.35257 8 119.9456 7 167.6279     | N 9 1.35060 8 119.5559 7 180.0000     |
| C 19 1.44399 9 128.4652 8 0.0000      | C 19 1.44235 9 127.3064 8 1.4119      | C 19 1.44175 9 126.9774 8 0.0000      |
| H 20 1.08354 19 110.5166 12 -60.4980  | H 20 1.08162 19 109.0987 12 31.3665   | H 20 1.08439 19 111.1606 12 -118.1860 |
| H 20 1.08353 21 109.0451 19 -121.6583 | H 20 1.08093 21 108.5658 19 -119.3806 | H 20 1.08017 21 108.5056 19 -119.3510 |
| H 20 1.07887 22 108.7069 21 118.3697  | H 20 1.08496 22 108.9054 21 118.3838  | H 20 1.08429 22 108.4690 21 118.2371  |
| C 3 1.50975 2 121.7472 4 -180.0000    | C 3 1.50976 2 121.3130 4 -179.1102    | C 3 1.50545 2 119.9736 4 180.0000     |
| H 24 1.08639 3 111.2548 15 -59.9036   | H 24 1.08663 3 110.9763 15 -72.4012   | H 24 1.08773 3 111.5446 15 -120.1764  |
| H 24 1.08638 25 107.3539 3 -121.9438  | H 24 1.08518 25 107.4786 3 -121.7127  | H 24 1.08426 25 107.6088 3 -122.2146  |
| H 24 1.08397 25 107.7486 26 -115.8096 | H 24 1.08371 25 107.7639 26 -116.1072 | H 24 1.08773 25 107.1207 26 -115.4589 |



**Table 6S.** The ground state coordinates of S0-min (left), MECI1(middle )and MECI5(right) used in LIIC in Z-matrices form at SA2-CASSCF(12,10)/6-31G\*level.

|                                       |                                       |                                       |
|---------------------------------------|---------------------------------------|---------------------------------------|
| C                                     | C                                     | C                                     |
| C 1 1.38003                           | C 1 1.38607                           | C 1 1.33197                           |
| C 2 1.38841 1 122.1299                | C 2 1.38286 1 122.1557                | C 2 1.45424 1 122.7992                |
| C 3 1.40624 2 117.8773 1 0.0000       | C 3 1.40527 2 117.7472 1 -0.0000      | C 3 1.40481 2 117.3463 1 -0.0000      |
| C 4 1.38311 3 121.4977 2 -0.0000      | C 4 1.38311 3 121.6175 2 -0.0000      | C 4 1.38289 3 122.7384 2 -0.0000      |
| C 1 1.40802 5 30.4707 2 -180.0000     | C 1 1.40333 5 30.5555 2 -180.0000     | C 1 1.46716 5 30.6326 2 -180.0000     |
| N 6 1.35886 1 122.4666 5 -180.0000    | N 6 1.35615 1 121.4923 5 180.0000     | N 6 1.27682 1 120.4142 5 -180.0000    |
| N 7 1.25712 6 130.5222 1 0.0000       | N 7 1.26134 6 139.4715 1 -4.6951      | N 7 1.20566 6 159.2844 1 -0.0000      |
| C 8 1.37734 7 124.4559 6 180.0000     | C 8 1.40253 7 116.3603 6 94.4852      | C 8 1.35285 7 146.1875 6 -180.0000    |
| N 9 1.28576 8 126.7519 7 -0.0000      | N 9 1.28628 8 127.7831 7 -7.9955      | N 9 1.28445 8 125.3120 7 -0.0000      |
| C 10 1.38089 9 104.4787 8 -180.0000   | C 10 1.37192 9 104.8450 8 -178.2781   | C 10 1.38912 9 103.7913 8 -180.0000   |
| C 11 1.35676 10 110.5062 9 -0.0000    | C 11 1.36241 10 110.1848 9 -0.0000    | C 11 1.35243 10 110.9329 9 0.0000     |
| H 1 1.07328 2 120.6573 6 -180.0000    | H 1 1.07370 2 120.5210 6 -180.0000    | H 1 1.07471 2 121.6892 6 180.0000     |
| H 2 1.07628 1 118.5295 3 180.0000     | H 2 1.07632 1 118.3585 3 180.0000     | H 2 1.07671 1 118.8986 3 -180.0000    |
| H 4 1.07614 5 119.0473 3 -180.0000    | H 4 1.07636 5 118.9241 3 180.0000     | H 4 1.07610 5 118.2025 3 -180.0000    |
| H 5 1.07382 4 121.1090 6 180.0000     | H 5 1.07392 4 120.9678 6 180.0000     | H 5 1.07261 4 121.6645 6 180.0000     |
| H 11 1.06941 10 121.0562 12 -180.0000 | H 11 1.06939 10 121.4084 12 -180.0000 | H 11 1.06922 10 120.6979 12 180.0000  |
| H 12 1.06833 11 132.5828 17 -0.0000   | H 12 1.06861 11 132.2059 17 0.0000    | H 12 1.06770 11 133.0329 17 -0.0000   |
| N 9 1.35236 8 119.0717 7 180.0000     | N 9 1.35259 8 118.4096 7 173.5326     | N 9 1.34896 8 119.5733 7 180.0000     |
| C 19 1.44403 9 128.4823 8 0.0000      | C 19 1.44782 9 128.3178 8 -0.0000     | C 19 1.44196 9 127.0702 8 0.0000      |
| H 20 1.08354 19 110.5111 12 -60.4932  | H 20 1.07753 19 109.0782 12 173.6129  | H 20 1.08436 19 111.1839 12 -117.7295 |
| H 20 1.08353 21 109.0431 19 -121.6465 | H 20 1.08353 21 109.0930 19 -120.8664 | H 20 1.08011 21 108.4978 19 -119.3395 |
| H 20 1.07882 22 108.7104 21 118.3746  | H 20 1.08274 22 109.0792 21 119.1061  | H 20 1.08423 22 108.4494 21 118.2487  |
| C 3 1.50971 2 121.7380 4 -180.0000    | C 3 1.51016 2 121.8508 4 180.0000     | C 3 1.50438 2 119.8583 4 -180.0000    |
| H 24 1.08638 3 111.2530 15 -59.9130   | H 24 1.08646 3 111.3004 15 60.1149    | H 24 1.08796 3 111.5630 15 -120.1029  |
| H 24 1.08637 25 107.3543 3 -121.9410  | H 24 1.08410 25 107.7100 3 -122.1816  | H 24 1.08430 25 107.6027 3 -122.2465  |
| H 24 1.08397 25 107.7493 26 -115.8111 | H 24 1.08652 25 107.3520 26 -115.7540 | H 24 1.08796 25 107.0714 26 -115.4256 |

**Table 7S.** Cartesian coordinates of S<sub>0</sub>-min (left) and S<sub>1</sub>-min (right) optimized at SA3-CASSCF(12,10)/6-31G\* level

| SA3-CASSCF(12,10)/6-31G* |               |               |               | SA3-CASSCF(12,10)/6-31G* |               |               |               |
|--------------------------|---------------|---------------|---------------|--------------------------|---------------|---------------|---------------|
| X                        | Y             | Z             |               | X                        | Y             | Z             |               |
| C                        | 0.0544038497  | 0.0554497516  | 0.0000253141  | C                        | -0.0325077552 | -0.0063230476 | 0.0001931290  |
| C                        | -0.6970951794 | -1.1152518390 | 0.0000258311  | C                        | -0.7402011976 | -1.1914047195 | 0.0002805914  |
| C                        | -0.1009631911 | -2.3624324416 | 0.0000540782  | C                        | -0.1095043478 | -2.4277969151 | 0.0000978391  |
| C                        | 1.2986041821  | -2.4319708770 | 0.0001158851  | C                        | 1.2966973219  | -2.4485659323 | -0.0001708369 |
| C                        | 2.0663516046  | -1.2751324583 | 0.0001219536  | C                        | 2.0365874009  | -1.2800238291 | -0.0002678989 |
| C                        | 1.4459368503  | -0.0210708290 | 0.0000669821  | C                        | 1.3747852599  | -0.0344259199 | -0.0000838673 |
| N                        | 2.3276967284  | 1.0903156887  | 0.0000966714  | N                        | 2.1274296581  | 1.0972771474  | -0.0001937529 |
| N                        | 1.7750380562  | 2.2048988004  | -0.0001129565 | N                        | 1.7835747051  | 2.3058700444  | -0.0000576337 |
| C                        | 2.6635528758  | 3.2928410304  | -0.0001040718 | C                        | 2.6602593638  | 3.3671135444  | 0.0000329293  |
| N                        | 3.9598145897  | 3.2909584820  | -0.0001519621 | N                        | 3.9448410598  | 3.3035635104  | 0.0002719183  |
| C                        | 4.3154147433  | 4.6212781944  | -0.0001301275 | C                        | 4.3555498477  | 4.6217785504  | 0.0002658165  |
| C                        | 3.2122670272  | 5.3955390137  | -0.0000731519 | C                        | 3.2837215769  | 5.4538227350  | 0.0000599072  |
| H                        | -0.4318423961 | 1.0108495504  | 0.0000175510  | H                        | -0.5448110609 | 0.9368388695  | 0.0003528880  |
| H                        | -1.7707108848 | -1.0424775289 | 0.0000094079  | H                        | -1.8156034237 | -1.1477951228 | 0.0005033688  |
| H                        | 1.7845591658  | -3.3919051222 | 0.0001702852  | H                        | 1.8120386586  | -3.3933010072 | -0.0002953328 |
| H                        | 3.1394128156  | -1.3199957577 | 0.0001860091  | H                        | 3.1102041735  | -1.3030958715 | -0.0004601902 |
| H                        | 5.3413447744  | 4.9224846331  | -0.0001782682 | H                        | 5.3943031095  | 4.8760109178  | 0.0003823912  |
| H                        | 3.0933915598  | 6.4585658110  | -0.0000498007 | H                        | 3.1951795854  | 6.5184794566  | 0.0000036324  |
| N                        | 2.1371359687  | 4.5517618830  | -0.0000724629 | N                        | 2.1681220927  | 4.6270244779  | -0.0001468392 |
| C                        | 0.7455785500  | 4.9484324447  | 0.0001420412  | C                        | 0.7881845535  | 5.0523127453  | -0.0001750003 |
| H                        | 0.5205715046  | 5.5343399016  | 0.8832933258  | H                        | 0.5723975477  | 5.6416053456  | 0.8831361352  |
| H                        | 0.5213516055  | 5.5373898745  | -0.8811631644 | H                        | 0.5736527342  | 5.6448461058  | -0.8816056162 |
| H                        | 0.1284203329  | 4.0657534062  | -0.0016574596 | H                        | 0.1472949635  | 4.1844293739  | -0.0022516600 |
| C                        | -0.9231188848 | -3.6297791541 | -0.0001086980 | C                        | -0.8921858176 | -3.7188240235 | 0.0000504297  |
| H                        | -0.7085407960 | -4.2342927627 | -0.8763709892 | H                        | -0.6623169305 | -4.3187027658 | -0.8760424074 |
| H                        | -0.7061830194 | -4.2360854167 | 0.8743192315  | H                        | -0.6600281823 | -4.3201599752 | 0.8745283302  |
| H                        | -1.9846275329 | -3.4116969783 | 0.0015290452  | H                        | -1.9598999966 | -3.5317863946 | 0.0015922294  |

**Table 8S.** Cartesian coordinates of S<sub>2</sub>-min (left) and MECI1 (right) optimized at SA3-CASSCF(12,10)/6-31G\* level

| SA3-CASSCF(12,10)/6-31G* |               |               |               | SA3-CASSCF(12,10)/6-31G* |               |               |               |
|--------------------------|---------------|---------------|---------------|--------------------------|---------------|---------------|---------------|
| X                        | Y             | Z             |               | X                        | Y             | Z             |               |
| C                        | 0.0884015398  | 0.0791032768  | 0.0001620763  | C                        | -0.6716001318 | 4.0752321408  | -1.0626866360 |
| C                        | -0.6920454230 | -1.1184695370 | 0.0004391088  | C                        | -1.8976769446 | 3.3958872309  | -1.0786906277 |
| C                        | -0.1461954585 | -2.3495263645 | 0.0001862871  | C                        | -1.9513765179 | 2.0273090578  | -1.1112270702 |
| C                        | 1.3044435981  | -2.4539772278 | -0.0003840699 | C                        | -0.7686268119 | 1.2721176990  | -1.1211264979 |
| C                        | 2.1413159542  | -1.2974780978 | -0.0006922771 | C                        | 0.4671174389  | 1.9280819382  | -1.1096249797 |
| C                        | 1.5837439231  | 0.0167615868  | -0.0004340880 | C                        | 0.5034963897  | 3.3189859669  | -1.0791711667 |
| N                        | 2.4135215122  | 1.0274895955  | -0.0007367206 | H                        | -2.8135167575 | 3.9608907737  | -1.0647316140 |
| N                        | 1.7792070769  | 2.2319274695  | -0.0006748159 | H                        | -2.8912876688 | 1.5076145346  | -1.1220002458 |
| C                        | 2.6195633015  | 3.2763859781  | -0.0001674408 | H                        | 1.3783984248  | 1.3626616856  | -1.1205836945 |
| N                        | 3.9464259516  | 3.2910354381  | 0.0003081910  | H                        | 1.4560785772  | 3.8181255426  | -1.0646348402 |
| C                        | 4.2951972689  | 4.6146636539  | 0.0006489636  | C                        | 0.9169934847  | -1.4820968857 | -0.3424437521 |
| C                        | 3.1883421129  | 5.3888356773  | 0.0003939719  | C                        | 1.9575507845  | -2.1346783020 | 1.3748038425  |
| H                        | -0.3882349170 | 1.0349323031  | 0.0003548343  | C                        | 2.4903429300  | -2.8296624043 | 0.3398938064  |
| H                        | -1.7626865759 | -1.0096419673 | 0.0008672160  | H                        | 2.2136287774  | -2.1879158861 | 2.4117955870  |
| H                        | 1.7624068642  | -3.4254841768 | -0.0005583268 | H                        | 3.2580835206  | -3.5701760054 | 0.2840208375  |
| H                        | 3.2090340121  | -1.3961766154 | -0.0011089624 | N                        | -0.9331069267 | -0.1162133929 | -1.1224203133 |
| H                        | 5.3194457703  | 4.9217744507  | 0.0010301029  | N                        | 0.0918910457  | -0.8525617356 | -1.2158602052 |
| H                        | 3.0791801657  | 6.4535470442  | 0.0005323412  | N                        | 0.9662067639  | -1.2783056230 | 0.9294564342  |
| N                        | 2.1099103163  | 4.5605561284  | -0.0001495505 | N                        | 1.7948305698  | -2.4083085207 | -0.7907407577 |
| C                        | 0.7219657796  | 4.9594205038  | -0.0003266660 | C                        | 2.0052800921  | -2.8248717440 | -2.1555011124 |
| H                        | 0.4916401550  | 5.5440731561  | 0.8831046477  | H                        | 2.3544049303  | -3.8485658228 | -2.1632278875 |
| H                        | 0.4931284253  | 5.5477712809  | -0.8816708983 | H                        | 1.0713975793  | -2.7756410329 | -2.6975760397 |
| H                        | 0.1081932305  | 4.0739970747  | -0.0026966614 | H                        | 2.7368938872  | -2.2011030202 | -2.6582901711 |
| C                        | -0.9588976602 | -3.6162426928 | 0.0003652152  | C                        | -0.6332886327 | 5.5844424372  | -1.0485789062 |
| H                        | -0.7400864181 | -4.2226363640 | -0.8750801413 | H                        | -0.9296459062 | 5.9901072041  | -2.0120955145 |
| H                        | -0.7385797444 | -4.2233708743 | 0.8749181324  | H                        | -1.3118899618 | 5.9862052979  | -0.3031263012 |
| H                        | -2.0205758611 | -3.4005034002 | 0.0013700302  | H                        | 0.3617665685  | 5.9521166605  | -0.8269552039 |

**Table 9S.** Cartesian coordinates of MECI2 (left) and MECI3 (right) optimized at SA3-CASSCF(12,10)/6-31G\* level.

| SA3-CASSCF(12,10)/6-31G*- |               |               |               | SA3-CASSCF(12,10)/6-31G*- |               |               |               |
|---------------------------|---------------|---------------|---------------|---------------------------|---------------|---------------|---------------|
| X                         | Y             | Z             |               | X                         | Y             | Z             |               |
| C                         | -2.4194027783 | 1.1611388458  | 2.7893942975  | C                         | 0.3262075256  | 2.4792566142  | 0.6131421758  |
| C                         | -3.0774176232 | 1.4969379789  | 1.6000608416  | C                         | -0.9181577240 | 2.8180766500  | 1.1280940501  |
| C                         | -2.6351531361 | 1.0340168350  | 0.3873238598  | C                         | -2.0958619976 | 2.3934713543  | 0.5451870990  |
| C                         | -1.5002397762 | 0.2135824699  | 0.3140277785  | C                         | -2.0035862704 | 1.5967719147  | -0.6076275025 |
| C                         | -0.8299022707 | -0.1413349494 | 1.4905906615  | C                         | -0.7809268141 | 1.2470418566  | -1.1530680462 |
| C                         | -1.2938410565 | 0.3346238176  | 2.7122583346  | C                         | 0.4063605817  | 1.6881613904  | -0.5400534779 |
| H                         | -3.9481930591 | 2.1279414264  | 1.6389965826  | N                         | 1.6075882752  | 1.3494547770  | -1.0773442861 |
| H                         | -3.1420997323 | 1.2905490017  | -0.5241396206 | N                         | 2.8423158805  | 1.5498018481  | -0.9941563422 |
| H                         | 0.0330987360  | -0.7769170281 | 1.4495809619  | C                         | 3.5763246339  | 0.6292118700  | -0.2269245220 |
| H                         | -0.7744607728 | 0.0603420171  | 3.6133495765  | N                         | 3.1217633584  | -0.3192958314 | 0.5116421176  |
| C                         | 1.1898316840  | -0.8683326976 | -1.2960403566 | C                         | 4.2359638187  | -0.8953416545 | 1.0687965479  |
| C                         | 3.1668509840  | -0.1645254341 | -1.5253445500 | C                         | 5.3599320890  | -0.2594081965 | 0.6356065116  |
| C                         | 3.2297172103  | -1.5019024137 | -1.7359749034 | H                         | 1.2254852440  | 2.8156695724  | 1.0935208479  |
| H                         | 3.9632985635  | 0.5489122799  | -1.5455381188 | H                         | -0.9543323379 | 3.4290029996  | 2.0134779578  |
| H                         | 4.0399748916  | -2.1627623626 | -1.9543318305 | H                         | -2.9036266399 | 1.2492023323  | -1.0848085261 |
| N                         | -1.1163404739 | -0.1813859949 | -0.9711799711 | H                         | -0.7248609726 | 0.6390903394  | -2.0365327115 |
| N                         | -0.1470464253 | -0.9843468969 | -1.0992706418 | H                         | 4.1583028687  | -1.7257854227 | 1.7380156115  |
| N                         | 1.8691082200  | 0.2252743817  | -1.2415785201 | H                         | 6.3972756168  | -0.4165445592 | 0.8383854027  |
| N                         | 1.9278755485  | -1.9694993190 | -1.5674801876 | N                         | 4.9241647613  | 0.7338480995  | -0.2145470835 |
| C                         | 1.4353311057  | -3.2990322752 | -1.8359039655 | C                         | 5.7581372602  | 1.6883546732  | -0.9144772486 |
| H                         | 2.2415124839  | -4.0053245363 | -1.6931616484 | H                         | 5.1453097225  | 2.2658908725  | -1.5866901537 |
| H                         | 0.6389720355  | -3.5453245093 | -1.1473905247 | H                         | 6.2418473100  | 2.3573009008  | -0.2127329329 |
| H                         | 1.0621086024  | -3.3904614300 | -2.8500301791 | H                         | 6.5156106979  | 1.1662554305  | -1.4853702854 |
| C                         | -2.9016139337 | 1.7003977718  | 4.1145691440  | C                         | -3.4456665347 | 2.7614159024  | 1.1144286785  |
| H                         | -2.5461524320 | 2.7153076888  | 4.2714167969  | H                         | -4.0106440854 | 1.8767924216  | 1.3947683834  |
| H                         | -3.9851835147 | 1.7231654259  | 4.1592031359  | H                         | -3.3431447041 | 3.3806974765  | 1.9983110587  |
| H                         | -2.5448749809 | 1.0957146069  | 4.9404232468  | H                         | -4.0426668089 | 3.3120107745  | 0.3926726849  |

**Table 10S.** Cartesian coordinates of MECI4 (left) and MECI5 (right) optimized at SA3-CASSCF(12,10)/6-31G\* level.

| SA3-CASSCF(12,10)/6-31G*- |               |               |               | SA3-CASSCF(12,10)/6-31G*- |               |               |               |
|---------------------------|---------------|---------------|---------------|---------------------------|---------------|---------------|---------------|
| X                         | Y             | Z             |               | X                         | Y             | Z             |               |
| C                         | -2.4818476687 | 1.9414360905  | 2.4322699877  | C                         | -0.4123961345 | 0.1522073975  | -0.0388874000 |
| C                         | -2.9458291100 | 2.2067523482  | 1.1335007756  | C                         | -1.1072892764 | -0.9889735067 | -0.0347416839 |
| C                         | -2.4456618398 | 1.5594059422  | 0.0378729214  | C                         | -0.4760132562 | -2.2883432473 | 0.0330486819  |
| C                         | -1.4267250645 | 0.5989775613  | 0.1912120341  | C                         | 0.9234502143  | -2.3215679591 | 0.0961864426  |
| C                         | -0.9397107104 | 0.3175054670  | 1.4745520132  | C                         | 1.6987402477  | -1.1723322052 | 0.0953977449  |
| C                         | -1.4764860518 | 0.9878159080  | 2.5736200909  | C                         | 1.0455831216  | 0.1126441973  | 0.0269876819  |
| H                         | -3.7217333978 | 2.9398844787  | 0.9923973879  | N                         | 1.7249475325  | 1.2045724134  | 0.0236226269  |
| H                         | -2.8169580379 | 1.7756023087  | -0.9465933609 | N                         | 1.9011033637  | 2.4014672761  | -0.0050304155 |
| H                         | -0.1569031766 | -0.4059246741 | 1.6031510359  | C                         | 2.8434428461  | 3.3681420203  | 0.0072212916  |
| H                         | -1.0940596083 | 0.7581496614  | 3.5528443655  | N                         | 4.1138894243  | 3.1725172036  | 0.0715412251  |
| C                         | 1.1242928776  | -0.6270885745 | -1.6205616847 | C                         | 4.6480079405  | 4.4527184414  | 0.0558089408  |
| C                         | 2.9902926907  | 0.3105251059  | -1.8984952725 | C                         | 3.6694149437  | 5.3847485645  | -0.0181343129 |
| C                         | 3.1409915446  | -0.9653482032 | -2.3508537594 | H                         | -0.9013660195 | 1.1079314541  | -0.0898050485 |
| H                         | 3.7147662063  | 1.0966646278  | -1.8729723901 | H                         | -2.1819656906 | -0.9428760662 | -0.0838073625 |
| H                         | 3.9737435103  | -1.4830868312 | -2.7755801785 | H                         | 1.4237291179  | -3.2728924089 | 0.1475579929  |
| N                         | -0.9387265207 | -0.0406964803 | -0.9020999062 | H                         | 2.7695216386  | -1.2194309413 | 0.1443474696  |
| N                         | -0.1959576285 | -0.9743278893 | -1.2847291485 | H                         | 5.7056018927  | 4.6041265030  | 0.0992874431  |
| N                         | 1.7100222853  | 0.5027762462  | -1.4423145201 | H                         | 3.6817640362  | 6.4518934257  | -0.0512751530 |
| N                         | 1.9182791891  | -1.5744529729 | -2.1680362715 | N                         | 2.4688703266  | 4.6644483319  | -0.0511211934 |
| C                         | 1.5831082289  | -2.9404087641 | -2.5122067480 | C                         | 1.1228878404  | 5.1756862063  | -0.1259447831 |
| H                         | 2.2035006482  | -3.6312693885 | -1.9543015417 | H                         | 0.5478137046  | 4.8936202152  | 0.7490577394  |
| H                         | 0.5488206154  | -3.1209640062 | -2.2701633741 | H                         | 1.1661605557  | 6.2538812736  | -0.1748228459 |
| H                         | 1.7334073142  | -3.1059648431 | -3.5720038544 | H                         | 0.6164027822  | 4.8116832304  | -1.0128811832 |
| C                         | -3.0586902141 | 2.6740336690  | 3.6202873545  | C                         | -1.3195877279 | -3.5352384294 | 0.0339783060  |
| H                         | -2.8949540722 | 3.7452755207  | 3.5421025146  | H                         | -1.9253029773 | -3.6083866351 | -0.8665254221 |
| H                         | -4.1303389474 | 2.5147835863  | 3.7017865961  | H                         | -0.7030869943 | -4.4255482428 | 0.0878171568  |
| H                         | -2.6048377481 | 2.3388105277  | 4.5460797212  | H                         | -2.0015567140 | -3.5555101496 | 0.8811315162  |

**Table 11S.** Cartesian coordinates of MECI6 optimized at SA3-CASSCF(12,10)/6-31G\* level.

| SA3-CASSCF(12,10)/6-31G* - |               |               |               |
|----------------------------|---------------|---------------|---------------|
| X                          | Y             | Z             |               |
| C                          | 0.4572080171  | 2.8177051227  | 0.1425276934  |
| C                          | -0.7373484269 | 3.5857103704  | 0.2428595028  |
| C                          | -2.0097299704 | 2.9913184832  | 0.2540581368  |
| C                          | -2.0911814859 | 1.6120165057  | 0.1638416321  |
| C                          | -0.9508114395 | 0.8124776687  | 0.0635502383  |
| C                          | 0.3751003608  | 1.3858669404  | 0.0488273857  |
| N                          | 1.3874814448  | 0.5491168419  | -0.0488193586 |
| N                          | 2.5934767315  | 1.1507094248  | -0.0567923891 |
| C                          | 3.5856404462  | 0.2637843751  | -0.1570812272 |
| N                          | 3.5588961277  | -1.0931538494 | -0.2483057722 |
| C                          | 4.8126832510  | -1.4700646798 | -0.3248832131 |
| C                          | 5.6856909017  | -0.3868206308 | -0.2866418825 |
| H                          | 1.4136671381  | 3.2947651519  | 0.1361167108  |
| H                          | -0.6561144376 | 4.6559332948  | 0.3120377989  |
| H                          | -3.0555282555 | 1.1360834432  | 0.1705311807  |
| H                          | -1.0291269521 | -0.2553134347 | -0.0056989822 |
| H                          | 5.0882492130  | -2.5028333100 | -0.4063219261 |
| H                          | 6.7508068844  | -0.3234007594 | -0.3254545967 |
| N                          | 4.8784636940  | 0.7124111492  | -0.1787959033 |
| C                          | 5.2826859846  | 2.0977134824  | -0.1020738598 |
| H                          | 4.9370841378  | 2.5405367395  | 0.8220749149  |
| H                          | 6.3619743409  | 2.1464475863  | -0.1396769969 |
| H                          | 4.8707306766  | 2.6572640224  | -0.9308538834 |
| C                          | -3.2439708861 | 3.8523131864  | 0.3630246491  |
| H                          | -3.3037540179 | 4.5569819962  | -0.4614933583 |
| H                          | -4.1450631487 | 3.2508594799  | 0.3526382604  |
| H                          | -3.2387059498 | 4.4292257186  | 1.2834588548  |

**Table 12S.** Cartesian coordinates of S<sub>0</sub>-min (left), S<sub>1</sub>-min (right) optimized at SA3-CASSCF(12,10)/6-311G\*\* level.

| SA3-CASSCF(12,10)/6-311G** |               |               |               | SA3-CASSCF(12,10)/6-311G** |               |               |               |
|----------------------------|---------------|---------------|---------------|----------------------------|---------------|---------------|---------------|
| X                          | Y             | Z             |               | X                          | Y             | Z             |               |
| C                          | 0.0479931882  | 0.0513914898  | -0.0000376269 | C                          | -0.0323900065 | -0.0062543593 | 0.0001908243  |
| C                          | -0.7024611552 | -1.1179668403 | -0.0000297206 | C                          | -0.7401405913 | -1.1912706983 | 0.0002793529  |
| C                          | -0.1029257817 | -2.3650960030 | 0.0000525245  | C                          | -0.1095273575 | -2.4277111078 | 0.0000982619  |
| C                          | 1.2937688248  | -2.4340406612 | 0.0001590409  | C                          | 1.2966808634  | -2.4485726402 | -0.0001723451 |
| C                          | 2.0617649654  | -1.2787707287 | 0.0001582817  | C                          | 2.0366170357  | -1.2801041548 | -0.0002711208 |
| C                          | 1.4398181330  | -0.0275027233 | 0.0000502103  | C                          | 1.3748764804  | -0.0344422029 | -0.0000890647 |
| N                          | 2.3420360300  | 1.1042630806  | 0.0000764292  | N                          | 2.1275955569  | 1.0971991203  | -0.0002026672 |
| N                          | 1.7858817392  | 2.2110922511  | -0.0001383414 | N                          | 1.7837731673  | 2.3057861256  | -0.0000568184 |
| C                          | 2.6720187211  | 3.3066961456  | -0.0001336888 | C                          | 2.6603382554  | 3.3670794248  | 0.0000153369  |
| N                          | 3.9600704035  | 3.3079152991  | -0.0002157858 | N                          | 3.9449337057  | 3.3036439560  | 0.0002272331  |
| C                          | 4.3145753544  | 4.6225131774  | -0.0001799550 | C                          | 4.3555153478  | 4.6218905297  | 0.0002764217  |
| C                          | 3.2108820502  | 5.4061269868  | -0.0000823007 | C                          | 3.2836247785  | 5.4538295033  | 0.0000507722  |
| H                          | -0.4369318812 | 1.0075973981  | -0.0000857728 | H                          | -0.5446431255 | 0.9369324495  | 0.0003525327  |
| H                          | -1.7764287693 | -1.0481777271 | -0.0000813270 | H                          | -1.8155385284 | -1.1476257611 | 0.0005018913  |
| H                          | 1.7785919525  | -3.3948234619 | 0.0002548177  | H                          | 1.8119375959  | -3.3933472080 | -0.0002971301 |
| H                          | 3.1349417906  | -1.3229209653 | 0.0002550224  | H                          | 3.1102337934  | -1.3031407275 | -0.0004636879 |
| H                          | 5.3409566734  | 4.9246928380  | -0.0002495767 | H                          | 5.3942482145  | 4.8761927040  | 0.0004422275  |
| H                          | 3.0868938719  | 6.4680353834  | -0.0000377603 | H                          | 3.1949671835  | 6.5184723655  | -0.0000208276 |
| N                          | 2.1445061442  | 4.5506432586  | -0.0000740612 | N                          | 2.1681089064  | 4.6269489431  | -0.0001541150 |
| C                          | 0.7480142000  | 4.9411484400  | 0.0002069810  | C                          | 0.7881410544  | 5.0520859827  | -0.0001672977 |
| H                          | 0.5257992182  | 5.5263732450  | 0.8846695062  | H                          | 0.5722764954  | 5.6413359535  | 0.8831470524  |
| H                          | 0.5264770615  | 5.5294688679  | -0.8823564336 | H                          | 0.5735293804  | 5.6445995292  | -0.8815855584 |
| H                          | 0.1344794492  | 4.0557806515  | -0.0015779817 | H                          | 0.1473557095  | 4.1841384053  | -0.0022550234 |
| C                          | -0.9247712759 | -3.6320871288 | -0.0001013247 | C                          | -0.8922507781 | -3.7186855722 | 0.0000561003  |
| H                          | -0.7071207107 | -4.2341801668 | -0.8773675175 | H                          | -0.6624142516 | -4.3185928447 | -0.8760232530 |
| H                          | -0.7049064203 | -4.2358763904 | 0.8754312057  | H                          | -0.6601400332 | -4.3200367601 | 0.8745335251  |
| H                          | -1.9861588769 | -3.4135284158 | 0.0014356548  | H                          | -1.9599439517 | -3.5315836550 | 0.0015878770  |

**Table 13S.** Cartesian coordinates of S<sub>2</sub>-min (left) and MECI1(right) optimized at SA3-CASSCF(12,10)/6-311G\*\* level.

| SA3-CASSCF(12,10)/6-31G** |               |               |               | SA3-CASSCF(12,10)/6-31G** |               |               |               |
|---------------------------|---------------|---------------|---------------|---------------------------|---------------|---------------|---------------|
| X                         | Y             | Z             |               | X                         | Y             | Z             |               |
| C                         | 0.0943025738  | 0.0675530102  | 0.0005215500  | C                         | -0.6716001318 | 4.0752321408  | -1.0626866360 |
| C                         | -0.6840355895 | -1.1340128463 | 0.0011869340  | C                         | -1.8976769446 | 3.3958872309  | -1.0786906277 |
| C                         | -0.1396570555 | -2.3696853213 | 0.0003855624  | C                         | -1.9513765179 | 2.0273090578  | -1.1112270702 |
| C                         | 1.2935754070  | -2.4755384474 | -0.0012156351 | C                         | -0.7686268119 | 1.2721176990  | -1.1211264979 |
| C                         | 2.1428526271  | -1.2982533707 | -0.0019683854 | C                         | 0.4671174389  | 1.9280819382  | -1.1096249797 |
| C                         | 1.5707041075  | 0.0243851790  | -0.0010301627 | C                         | 0.5034963897  | 3.3189859669  | -1.0791711667 |
| N                         | 2.3931394271  | 1.0401526130  | -0.0016187754 | H                         | -2.8135167575 | 3.9608907737  | -1.0647316140 |
| N                         | 1.7486585296  | 2.2417134848  | -0.0014014158 | H                         | -2.8912876688 | 1.5076145346  | -1.1220002458 |
| C                         | 2.6364538080  | 3.3104185003  | -0.0001208762 | H                         | 1.3783984248  | 1.3626616856  | -1.1205836945 |
| N                         | 3.9295792903  | 3.3073444591  | 0.0012713309  | H                         | 1.4560785772  | 3.8181255426  | -1.0646348402 |
| C                         | 4.2925850260  | 4.6200400297  | 0.0020734491  | C                         | 0.9169934847  | -1.4820968857 | -0.3424437521 |
| C                         | 3.1972214018  | 5.4132992985  | 0.0011471455  | C                         | 1.9575507845  | -2.1346783020 | 1.3748038425  |
| H                         | -0.3924290939 | 1.0186207044  | 0.0010674120  | C                         | 2.4903429300  | -2.8296624043 | 0.3398938064  |
| H                         | -1.7545681912 | -1.0249864958 | 0.0024000876  | H                         | 2.2136287774  | -2.1879158861 | 2.4117955870  |
| H                         | 1.7590170261  | -3.4434497659 | -0.0018476405 | H                         | 3.2580835206  | -3.5701760054 | 0.2840208375  |
| H                         | 3.2102654821  | -1.3952476687 | -0.0031940374 | N                         | -0.9331069267 | -0.1162133929 | -1.1224203133 |
| H                         | 5.3215417286  | 4.9145886177  | 0.0032410241  | N                         | 0.0918910457  | -0.8525617356 | -1.2158602052 |
| H                         | 3.0825453078  | 6.4764014826  | 0.0013558375  | N                         | 0.9662067639  | -1.2783056230 | 0.9294564342  |
| N                         | 2.1229315549  | 4.5658846466  | -0.0003085647 | N                         | 1.7948305698  | -2.4083085207 | -0.7907407577 |
| C                         | 0.7318127136  | 4.9652775891  | -0.0014094567 | C                         | 2.0052800921  | -2.8248717440 | -2.1555011124 |
| H                         | 0.5087565553  | 5.5515979202  | 0.8829064805  | H                         | 2.3544049303  | -3.8485658228 | -2.1632278875 |
| H                         | 0.5115411716  | 5.5557340492  | -0.8836512900 | H                         | 1.0713975793  | -2.7756410329 | -2.6975760397 |
| H                         | 0.1131679055  | 4.0831693624  | -0.0044541529 | H                         | 2.7368938872  | -2.2011030202 | -2.6582901711 |
| C                         | -0.9635374485 | -3.6303418333 | 0.0010449359  | C                         | -0.6332886327 | 5.5844424372  | -1.0485789062 |
| H                         | -0.7491444183 | -4.2358623980 | -0.8758432219 | H                         | -0.9296459062 | 5.9901072041  | -2.0120955145 |
| H                         | -0.7467458676 | -4.2365251241 | 0.8768819875  | H                         | -1.3118899618 | 5.9862052979  | -0.3031263012 |
| H                         | -2.0227690791 | -3.4035103753 | 0.0025803774  | H                         | 0.3617665685  | 5.9521166605  | -0.8269552039 |



**Table 14S.** Cartesian coordinates of MECI2 (left) and MECI3 (right) optimized at SA3-CASSCF(12,10)/6-311G\*\* level.

| SA3-CASSCF(12,10)/6-31G** |               |               |               | SA3-CASSCF(12,10)/6-31G*.* |               |               |               |
|---------------------------|---------------|---------------|---------------|----------------------------|---------------|---------------|---------------|
| X                         | Y             | Z             |               | X                          | Y             | Z             |               |
| C                         | -2.4545528076 | 1.1760303216  | 2.8018439738  | C                          | 0.3267652454  | 2.4742520060  | 0.6144826033  |
| C                         | -3.1396343272 | 1.4311154632  | 1.6145876560  | C                          | -0.9169967363 | 2.8142586707  | 1.1292154890  |
| C                         | -2.6754838356 | 0.9610431603  | 0.4088697365  | C                          | -2.0938784161 | 2.3934396556  | 0.5452751810  |
| C                         | -1.4955203482 | 0.2148215800  | 0.3510862111  | C                          | -2.0019346099 | 1.5996700476  | -0.6089006735 |
| C                         | -0.7930005768 | -0.0572117991 | 1.5291213141  | C                          | -0.7811413663 | 1.2498677156  | -1.1541756031 |
| C                         | -1.2761262785 | 0.4241835251  | 2.7378490955  | C                          | 0.4061019779  | 1.6871946134  | -0.5399276585 |
| H                         | -4.0499096763 | 2.0047698650  | 1.6414337111  | N                          | 1.6065471656  | 1.3463340695  | -1.0786993931 |
| H                         | -3.2050483439 | 1.1565766303  | -0.5053358763 | N                          | 2.8390899149  | 1.5459104501  | -0.9975147703 |
| H                         | 0.1127438583  | -0.6313467509 | 1.4971871528  | C                          | 3.5756281437  | 0.6280737042  | -0.2271886768 |
| H                         | -0.7315330517 | 0.2146682553  | 3.6419923001  | N                          | 3.1211059690  | -0.3168178955 | 0.5117738822  |
| C                         | 1.2474896254  | -0.8654255684 | -1.2589260526 | C                          | 4.2354062575  | -0.8919834992 | 1.0723957652  |
| C                         | 3.2537012073  | -0.2325521674 | -1.5160397403 | C                          | 5.3580487826  | -0.2568082985 | 0.6386018663  |
| C                         | 3.2503186657  | -1.5485586502 | -1.7658207300 | H                          | 1.2260438668  | 2.8069923701  | 1.0976293829  |
| H                         | 4.0789059418  | 0.4472227898  | -1.5357491788 | H                          | -0.9525244992 | 3.4230242710  | 2.0164358322  |
| H                         | 4.0354711410  | -2.2221825813 | -2.0358117612 | H                          | -2.9025107752 | 1.2543896780  | -1.0873373121 |
| N                         | -1.0906618797 | -0.1928748183 | -0.9321646564 | H                          | -0.7252250447 | 0.6438835140  | -2.0392052729 |
| N                         | -0.0848360408 | -0.9382454840 | -1.0342343883 | H                          | 4.1575499459  | -1.7209413954 | 1.7436277084  |
| N                         | 1.9763363732  | 0.2037058733  | -1.1812011511 | H                          | 6.3951707374  | -0.4141834917 | 0.8432419111  |
| N                         | 1.9497722768  | -1.9836958347 | -1.5908803717 | N                          | 4.9220467106  | 0.7343110900  | -0.2147566052 |
| C                         | 1.4046159387  | -3.2817879696 | -1.9084773262 | C                          | 5.7562649916  | 1.6888481346  | -0.9168671010 |
| H                         | 2.2114375173  | -4.0024993422 | -1.9275806295 | H                          | 5.1419625083  | 2.2646501505  | -1.5901394896 |
| H                         | 0.6931296355  | -3.5858959915 | -1.1508287446 | H                          | 6.2388636667  | 2.3604769535  | -0.2156755844 |
| H                         | 0.9092080185  | -3.2814493546 | -2.8745676399 | H                          | 6.5140200149  | 1.1657795509  | -1.4878898310 |
| C                         | -2.9530004352 | 1.7224358861  | 4.1175455058  | C                          | -3.4433348397 | 2.7615075172  | 1.1143368913  |
| H                         | -2.5565633341 | 2.7190549730  | 4.2946572297  | H                          | -4.0076576174 | 1.8751161016  | 1.3913474790  |
| H                         | -4.0352183296 | 1.7911768736  | 4.1293003721  | H                          | -3.3391057161 | 3.3782402445  | 1.9998414277  |
| H                         | -2.6462828345 | 1.0936758164  | 4.9459741881  | H                          | -4.0371915230 | 3.3149184779  | 0.3917885606  |

**Table 15S.** Cartesian coordinates of MECI4 (left) and MECI5 (right) optimized at SA3-CASSCF(12,10)/6-311G\*\* level.

| SA3-CASSCF(12,10)/6-311G** |               |               |               | SA3-CASSCF(12,10)/6-311G** |               |               |               |
|----------------------------|---------------|---------------|---------------|----------------------------|---------------|---------------|---------------|
| X                          | Y             | Z             |               | X                          | Y             | Z             |               |
| C                          | -2.4761176821 | 1.9340920052  | 2.4309977368  | C                          | -0.4123961345 | 0.1522073975  | -0.0388874000 |
| C                          | -2.9474869720 | 2.2227240390  | 1.1405581712  | C                          | -1.1072892764 | -0.9889735067 | -0.0347416839 |
| C                          | -2.4513358437 | 1.5763026095  | 0.0244948665  | C                          | -0.4760132562 | -2.2883432473 | 0.0330486819  |
| C                          | -1.4410843013 | 0.6083955048  | 0.1720820084  | C                          | 0.9234502143  | -2.3215679591 | 0.0961864426  |
| C                          | -0.9595266053 | 0.3166758104  | 1.4534304785  | C                          | 1.6987402477  | -1.1723322052 | 0.0953977449  |
| C                          | -1.4880437248 | 0.9792056842  | 2.5530874943  | C                          | 1.0455831216  | 0.1126441973  | 0.0269876819  |
| H                          | -3.7179462926 | 2.9637122773  | 1.0117115976  | N                          | 1.7249475325  | 1.2045724134  | 0.0236226269  |
| H                          | -2.8234985373 | 1.8051869471  | -0.9567418781 | N                          | 1.9011033637  | 2.4014672761  | -0.0050304155 |
| H                          | -0.1825851618 | -0.4137283317 | 1.5794354901  | C                          | 2.8434428461  | 3.3681420203  | 0.0072212916  |
| H                          | -1.1032169787 | 0.7352088306  | 3.5285087651  | N                          | 4.1138894243  | 3.1725172036  | 0.0715412251  |
| C                          | 1.1080574619  | -0.6199041178 | -1.6252721498 | C                          | 4.6480079405  | 4.4527184414  | 0.0558089408  |
| C                          | 2.9879591833  | 0.3141183898  | -1.9166146105 | C                          | 3.6694149437  | 5.3847485645  | -0.0181343129 |
| C                          | 3.1273501293  | -0.9580770822 | -2.3404083953 | H                          | -0.9013660195 | 1.1079314541  | -0.0898050485 |
| H                          | 3.7164760265  | 1.0964963924  | -1.9047017367 | H                          | -2.1819656906 | -0.9428760662 | -0.0838073625 |
| H                          | 3.9689939790  | -1.4749432669 | -2.7518141824 | H                          | 1.4237291179  | -3.2728924089 | 0.1475579929  |
| N                          | -0.9554995163 | -0.0289775849 | -0.9242477301 | H                          | 2.7695216386  | -1.2194309413 | 0.1443474696  |
| N                          | -0.2053586562 | -0.9590932650 | -1.2978875857 | H                          | 5.7056018927  | 4.6041265030  | 0.0992874431  |
| N                          | 1.7028375914  | 0.5214874719  | -1.4660345737 | H                          | 3.6817640362  | 6.4518934257  | -0.0512751530 |
| N                          | 1.9213704803  | -1.5737646447 | -2.1607437225 | N                          | 2.4688703266  | 4.6644483319  | -0.0511211934 |
| C                          | 1.5989868776  | -2.9491701657 | -2.4830238884 | C                          | 1.1228878404  | 5.1756862063  | -0.1259447831 |
| H                          | 2.2082928014  | -3.6282848144 | -1.8974653013 | H                          | 0.5478137046  | 4.8936202152  | 0.7490577394  |
| H                          | 0.5598052286  | -3.1258131655 | -2.2567686313 | H                          | 1.1661605557  | 6.2538812736  | -0.1748228459 |
| H                          | 1.7678959125  | -3.1368082345 | -3.5370798865 | H                          | 0.6164027822  | 4.8116832304  | -1.0128811832 |
| C                          | -3.0405160375 | 2.6568304847  | 3.6307399860  | C                          | -1.3195877279 | -3.5352384294 | 0.0339783060  |
| H                          | -2.8668207874 | 3.7274280556  | 3.5620367638  | H                          | -1.9253029773 | -3.6083866351 | -0.8665254221 |
| H                          | -4.1132799455 | 2.5041438148  | 3.7133717978  | H                          | -0.7030869943 | -4.4255482428 | 0.0878171568  |
| H                          | -2.5839033163 | 2.3054227777  | 4.5491139042  | H                          | -2.0015567140 | -3.5555101496 | 0.8811315162  |

**Table 16S.** Cartesian coordinates of MECI6 optimized at SA3-CASSCF(12,10)/6-311G\*\* level.

| SA3-CASSCF(12,10)/6-311G** |               |               |               |
|----------------------------|---------------|---------------|---------------|
| X                          | Y             | Z             |               |
| C                          | 0.5097743860  | 2.7393197526  | 0.1321490836  |
| C                          | -0.7481617897 | 3.5674256800  | 0.2415913908  |
| C                          | -2.0720904039 | 2.9823657947  | 0.2566276089  |
| C                          | -2.1678332664 | 1.6497182384  | 0.1685334361  |
| C                          | -1.0117725601 | 0.7836480675  | 0.0598707829  |
| C                          | 0.4296537094  | 1.3084019198  | 0.0392444247  |
| N                          | 1.3546287287  | 0.4161013344  | -0.0567857456 |
| N                          | 2.5922107941  | 1.1580652348  | -0.0566977331 |
| C                          | 3.6076345030  | 0.2245389711  | -0.1603153575 |
| N                          | 3.5948858988  | -1.0714266192 | -0.2470340730 |
| C                          | 4.8885355941  | -1.4496142121 | -0.3244897176 |
| C                          | 5.7019994001  | -0.3580734397 | -0.2837473756 |
| H                          | 1.4493834654  | 3.2408707169  | 0.1265971606  |
| H                          | -0.6309528600 | 4.6320813981  | 0.3102939720  |
| H                          | -3.1339054815 | 1.1761600175  | 0.1762073892  |
| H                          | -1.1267724557 | -0.2789791295 | -0.0118307337 |
| H                          | 5.1714837708  | -2.4787373351 | -0.4050796640 |
| H                          | 6.7665735760  | -0.2627839445 | -0.3201442200 |
| N                          | 4.8807218473  | 0.7133494198  | -0.1785516366 |
| C                          | 5.2867984232  | 2.1028773158  | -0.1018535582 |
| H                          | 4.9476020857  | 2.5493328206  | 0.8227823350  |
| H                          | 6.3669325618  | 2.1437536719  | -0.1400871265 |
| H                          | 4.8811287015  | 2.6657226395  | -0.9313481445 |
| C                          | -3.2610297821 | 3.8984887788  | 0.3696782793  |
| H                          | -3.2934158330 | 4.6001669970  | -0.4602012638 |
| H                          | -4.1858701308 | 3.3345454238  | 0.3700556178  |
| H                          | -3.2196385027 | 4.4803348082  | 1.2871884793  |
